# Supplementary material for: Self-polymerized Polyphenol-based Platform for the Management of Ocular Surface Inflammation
Source: Research Square preprint supplement (doi:10.21203/rs.3.rs-6684162/v1), 2025-08-18
Supplement: Supplementary file 1 [file c03359741d1e0361d9f8f06d.pdf]

## Table of Contents

|    |                             |    |
|----|-----------------------------|----|
| 1  |                             |    |
| 2  |                             |    |
| 3  | Materials.....              | 3  |
| 4  | Chemicals.....              | 3  |
| 5  | Cells and animals.....      | 3  |
| 6  | Characterizations.....      | 5  |
| 7  | Cell culture.....           | 5  |
| 8  | Safety evaluation.....      | 5  |
| 9  | Supplementary Figures ..... | 6  |
| 10 | Supplementary Fig. 1.....   | 6  |
| 11 | Supplementary Fig. 2.....   | 6  |
| 12 | Supplementary Fig. 3.....   | 7  |
| 13 | Supplementary Fig. 4.....   | 7  |
| 14 | Supplementary Fig. 5.....   | 8  |
| 15 | Supplementary Fig. 6.....   | 8  |
| 16 | Supplementary Fig. 7.....   | 8  |
| 17 | Supplementary Fig. 8.....   | 9  |
| 18 | Supplementary Fig. 9.....   | 9  |
| 19 | Supplementary Fig. 10.....  | 10 |
| 20 | Supplementary Fig. 11.....  | 10 |
| 21 | Supplementary Fig. 12.....  | 11 |
| 22 | Supplementary Fig. 13.....  | 11 |
| 23 | Supplementary Fig. 14.....  | 12 |
| 24 | Supplementary Fig. 15.....  | 12 |
| 25 | Supplementary Fig. 16.....  | 13 |
| 26 | Supplementary Fig. 17.....  | 13 |
| 27 | Supplementary Fig. 18.....  | 13 |
| 28 | Supplementary Fig. 19.....  | 14 |
| 29 | Supplementary Fig. 20.....  | 14 |
| 30 | Supplementary Fig. 21.....  | 14 |

31      Supplementary Fig. 22. ....15

32      Supplementary Fig. 23. ....15

33      Supplementary Fig. 24. ....15

34      Supplementary Fig. 25. ....16

35      Supplementary Fig. 26. ....16

36      Supplementary Fig. 27. ....16

37      Supplementary Tables.....17

38      Supplementary Table 1.....17

39      Supplementary Table 2.....18

40

41

## 42    **Materials**

43    **Chemicals.** Sodium hyaluronate (mW  $\approx$  30 kDa) was purchased from Bloomage Biotech. (Beijing, China). Cerium (III)  
44    nitrate hexahydrate, hydrogen peroxide solution (30 wt.% H<sub>2</sub>O<sub>2</sub>), amiloride hydrochloride, genistein, chlorpromazine,  
45    and paraformaldehyde solution (4 wt.% PFA) were purchased from Titan Biotech. (Shanghai, China).  
46    1-(3-Dimethylaminopropyl)-3-ethylcarbodiimide hydrochloride (EDC), 1-hydroxybenzotriazole (HOBT),  
47    mercaptoethylamine hydrochloride, 2',7'-dichlorodihydrofluorescein diacetate (DCFH-DA), and Annexin  
48    V-fluorescein isothiocyanate (FITC) apoptosis detection kit were purchased from Aladdin Biochem Tech. (Shanghai,  
49    China). Benzalkonium chloride (BAK) and scopolamine (SCOP) were purchased from Sigma-Aldrich (St. Louis,  
50    USA). Rosmarinic acid was purchased from Meryer Biotech. (Shanghai, China). ABTS free radical scavenging  
51    capacity assay kit was purchased from Solarbio Biotech. (Beijing, China). 10 mM phosphate buffered saline (PBS),  
52    Dulbecco's modified eagle medium (DMEM), and 1% penicillin/streptomycin were purchased from Thermo Fisher  
53    Scientific (MA, USA). 10% Fetal bovine serum (FBS)-Premium were purchased from NEWZERUM (Christchurch,  
54    New Zealand). Triton-X 100 solution, Actin-Tracker Red-594, Bradford protein assay kit, and live/dead  
55    viability/cytotoxicity assay kit were purchased from Beyotime Biotech. (Shanghai, China). Cell counting kit-8 (CCK-8)  
56    was purchased from Life-iLab (Shanghai, China). Mucin, lipopolysaccharide (LPS), and Total antioxidant capacity  
57    assay kit with ferric reducing ability of plasma (FRAP) method were purchased from Yuanye Bio-Tech. (Shanghai,  
58    China). 4',6-diamidino-2-phenylindole (DAPI) was purchased from Yeasen Biotech. (Shanghai, China).  
59    Enzyme-linked immunosorbent assay (ELISA) kits of Transforming Growth Factor- $\beta$  (TGF- $\beta$ ), Tumor Necrosis  
60    Factor- $\alpha$  (TNF- $\alpha$ ), and Interleukin-6 (IL-6) were purchased from Solarbio Biotech. (Beijing, China).

61        The primary antibodies used in study were listed as follows:  $\gamma$ -Histone 2A.X ( $\gamma$ -H2A.X) antibody (Ser 139) (Santa  
62    Cruz, 1:1000, USA), inducible Nitric Oxide Synthase (iNOS) polyclonal antibody (Proteintech, 1:200), Arginase-1  
63    (Arg-1) polyclonal antibody (Proteintech, 1:200), phycoerythrin (PE)-conjugated anti-mouse Cluster of Differentiation  
64    86 (CD86) antibody (Thermo Fisher Scientific, 1:200, USA), allophycocyanin (APC)-conjugated anti-mouse CD206  
65    antibody (BioLegend, 1:200, USA), Interleukin-6 (IL-6) monoclonal antibody (Proteintech, 1:200, USA), and Matrix  
66    Metalloproteinase-9 (MMP-9) polyclonal antibody (Proteintech, 1:200, USA). The secondary antibodies used in this  
67    study were listed as follows: HRP-conjugated Goat anti-Rabbit IgG (Proteintech, 1:5000), CoraLite 488-conjugated  
68    Goat anti-Rabbit IgG (Proteintech, 1:2000), and CoraLite 594-conjugated Goat anti-Rabbit IgG (Proteintech, 1:2000).

69 **Cells and animals.** Mouse macrophage cells (RAW264.7) and Human Corneal Epithelial Cells (HCECs) were  
70 purchased from American Type Culture Collection (ATCC). The animal experiments conducted in this study were  
71 carried out according to the guidelines set forth by the Association for Research in Vision and Ophthalmology  
72 Statement for the Use of Animals in Ophthalmic and Vision Research, as well as the Animal Care and Use Committee  
73 at Zhejiang University. Approval for these experiments was obtained from the Animal Ethics Committee at the Second  
74 Affiliated Hospital, School of Medicine, Zhejiang University (Approval number: 2024-284). All C57BL/6 mice (6-8  
75 weeks,  $20 \pm 2$  g) were provided by SLAC Laboratory Animal Co., Ltd (Shanghai, China). The mice were maintained  
76 in a controlled environment featuring a stable temperature and a standardized light/dark cycle, with unrestricted access  
77 to food and water.

78 **Supplementary Methods**

79 **Characterizations.** Zetasizer Nano ZS90 (Malvern Instruments, Worcestershire, UK) was utilized to measure the size  
80 distribution and surface  $\zeta$ -potential of RHC NPs and *s*-RHC NPs. *In-situ* FTIR analysis of *p*-RosA was detected by an  
81 *in-situ* mid-infrared-based system ReactIR 15 (Mettler Toledo). The morphology and chemical compositions of NPs  
82 were observed by the Talos F200X field emission transmission electron microscope (TEM) (Thermo Fisher Scientific)  
83 at an accelerated voltage of 200 kV. Ultraviolet-visible spectra (UV-*vis*) were collected by the UV-2700 UV-*vis*  
84 spectrophotometer (Shimadzu). X-ray Photoelectron Spectroscopy (XPS) experiments were carried out using a Thermo  
85 ESCALAB 250XI spectrometer. Various kits (ABTS/MB/FRAP) were employed according to the instructions to  
86 evaluate the oxidation resistance of NPs.

87

88 **Cell culture.** RAW264.7 cells were cultured in Dulbecco's modified Eagle medium with 10% (v/v) fetal bovine serum  
89 and 1% penicillin/streptomycin. HCECs were cultured in Dulbecco's Modified Eagle Medium/Nutrient Mixture F-12  
90 (DMEM/F12) medium with 10% (v/v) FBS and 1% penicillin/streptomycin. Both two types of cells were cultured at  
91 37 °C in a humidified atmosphere containing 5% CO<sub>2</sub> and under recommended conditions.

92

93 **Safety evaluation.** Twenty mice were divided into four groups randomly and received topical instillation in the right  
94 eye of 5  $\mu$ L of 0.9% saline (w/v), RosA, Ce<sup>3+</sup>, RHC, and *s*-RHC (RosA: 200  $\mu$ g/mL, Ce<sup>3+</sup>: 60.8  $\mu$ g/mL at a final  
95 concentration) twice per day for 14 consecutive days and their body weights were measured at a fixed time during the  
96 treatment period. On the last day of treatment, the mice's right eyes were monitored using a digital slit lamp. The OCT  
97 images were captured by immobilizing the anaesthetized mice onto the OCT device (Micron IV, Phoenix Research)  
98 and acquiring images during the scanning of the corneas' central region using the probe. Then, these mice were  
99 sacrificed by overdose anesthesia, and the right eyeballs of each mouse were carefully removed and processed into  
100 H&E sections.

101

## Supplementary Figures

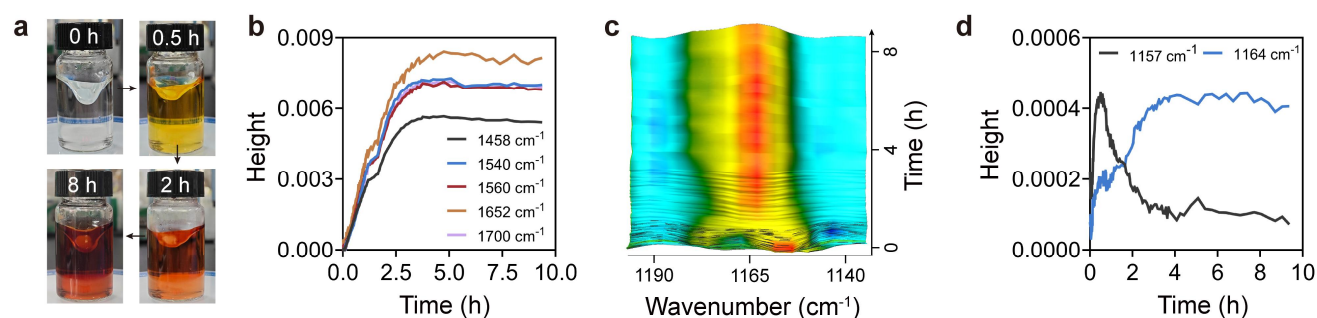

**Supplementary Fig. 1.** (a) Color change during the formation of *p*-RosA in solutions. (b) *In-situ* detection of peak changes in FTIR (1458, 1540, 1560, 1652, and 1700 cm<sup>-1</sup>) which weighted by relevant heights. (c) *In-situ* FTIR spectra (1140 cm<sup>-1</sup> ~ 1190 cm<sup>-1</sup>) detecting the polymerization of RosA, and (d) the evaluation weighted by relevant heights (1157 and 1164 cm<sup>-1</sup>).

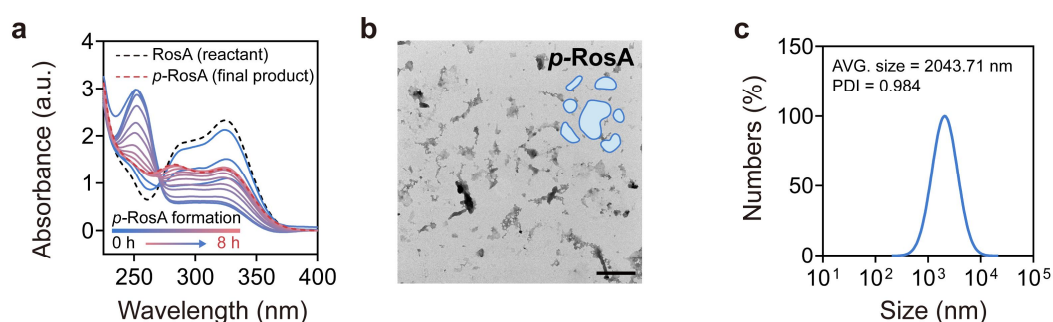

**Supplementary Fig. 2.** (a) Changes of UV-vis spectra during the formation of *p*-RosA in solutions. (b) The representative transmission electron microscopy (TEM) image and cartoon (inset) of *p*-RosA. Scale bar = 1 μm. (c) Hydrodynamic size distribution and PDI value of *p*-RosA solution.

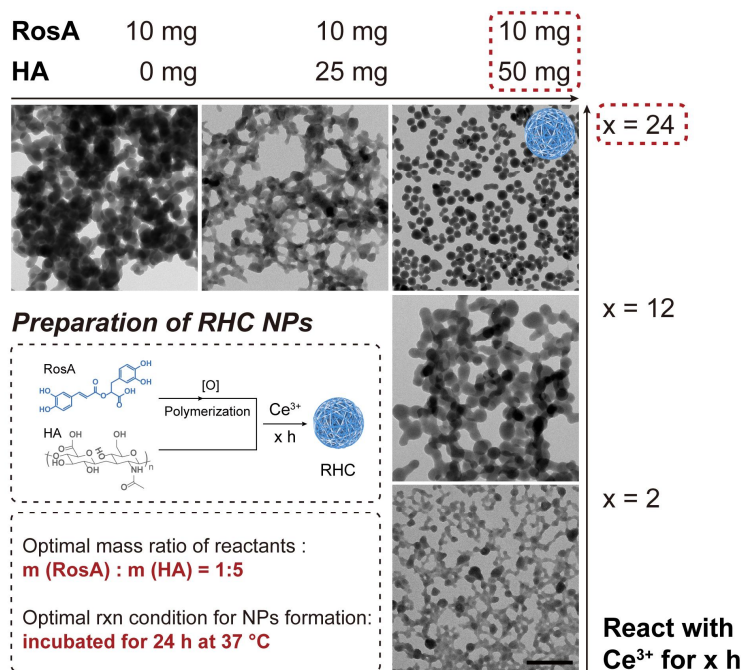

**Supplementary Fig. 3.** Representative TEM images and cartoon (inset) of RHC NPs synthesized under different conditions and the corresponding annotations. Scale bar = 500 nm.

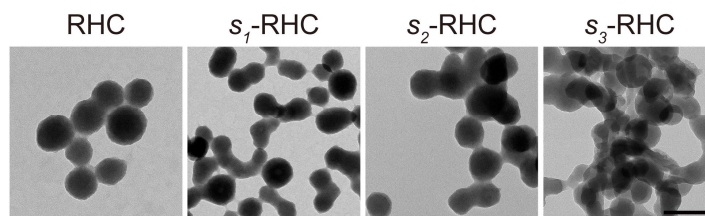

**Supplementary Fig. 4.** Representative TEM images of RHC NPs and three thiolated-RHC NPs. Scale bar = 300 nm.

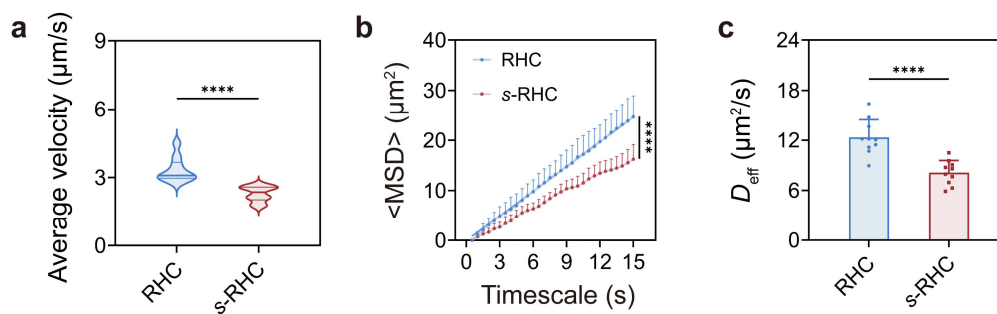

123 **Supplementary Fig. 5. (a)** Average velocity of RHC NPs and *s*-RHC NPs incubated with mucin solutions within 15 s.  
 124 **(b)** Mean square displacement (MSD) values as a function of time scale for two kinds of NPs in mucin solutions. **(c)**  
 125 Corresponding effective diffusion coefficient ( $D_{\text{eff}}$ ) for two kinds of NPs in mucin solutions.

126

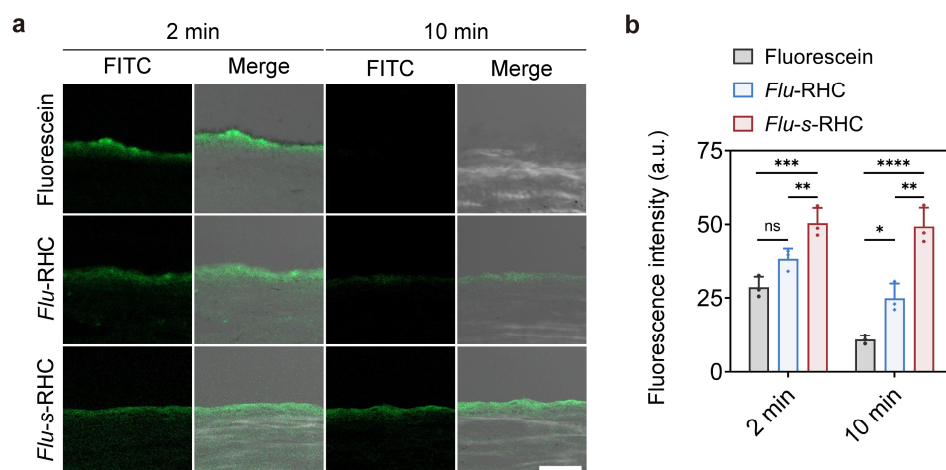

127

128 **Supplementary Fig. 6. (a)** Ocular surface frozen sections of mice, and **(b)** the quantitative assessment of average  
 129 fluorescein intensity from ocular surface frozen sections of mice, which were administered free fluorescein, *Flu*-RHC  
 130 NPs, and *Flu*-*s*-RHC NPs under conscious conditions for either 2 or 10 min (n=3), scale bar = 50  $\mu\text{m}$ .

131

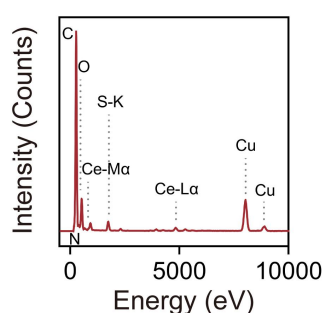

132

133 **Supplementary Fig. 7. Energy dispersive spectrum (EDS) of *s*-RHC NPs.**

134



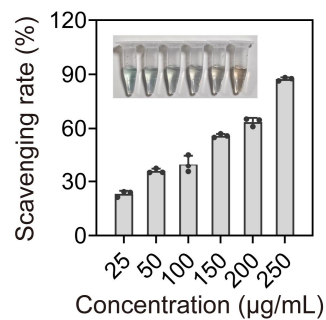

**Supplementary Fig. 8.** ABTS•+ scavenging ability of *s*-RHC NPs at different concentrations and the digital picture (inset) shown the color changes (n = 3).

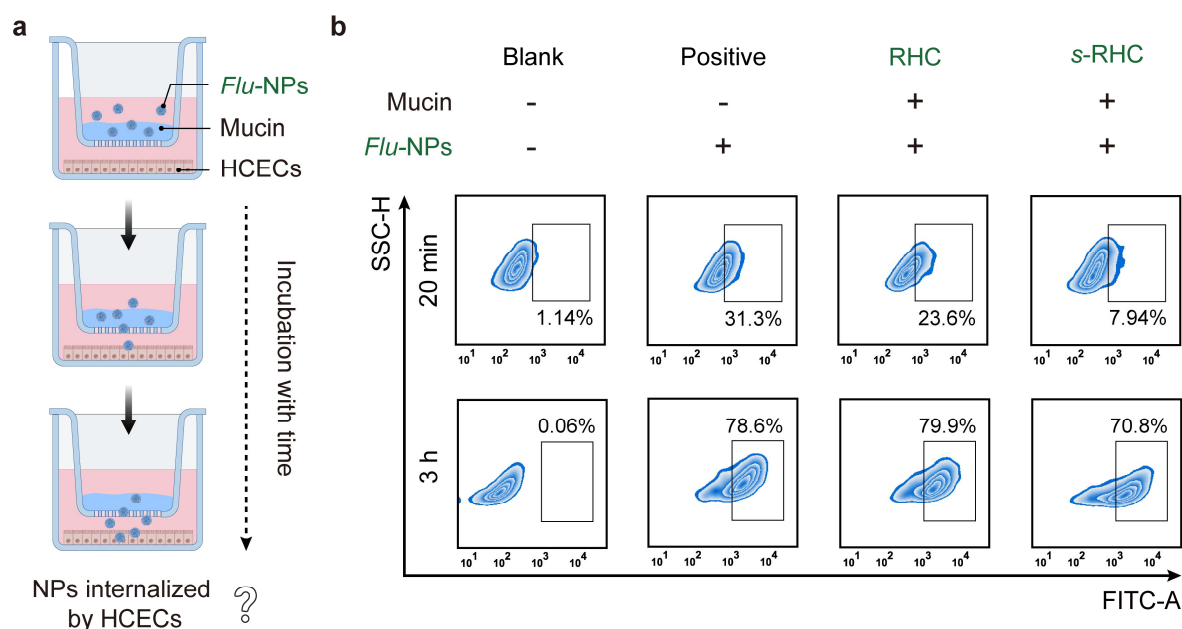

**Supplementary Fig. 9.**(a) Schematic diagram of HCECs monolayer transwell experiments mimicking the interactions between fluorescein-labelled NPs and ocular surface. (b) Group assignments and flow cytometry results of internalized formulations by HCECs cultured in the transwell at different time points (n = 3).

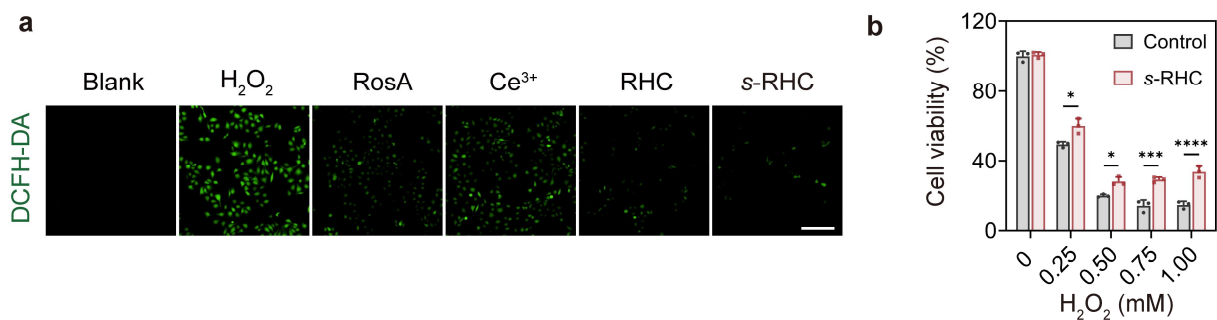

**Supplementary Fig. 10.** (a) Representative DCFH-DA fluorescence staining of HCECs after different treatments. Scale bar = 100  $\mu$ m. (b) Cell viability of different concentrations of H<sub>2</sub>O<sub>2</sub>-treated HCECs protected by s-RHC NPs (n = 3).

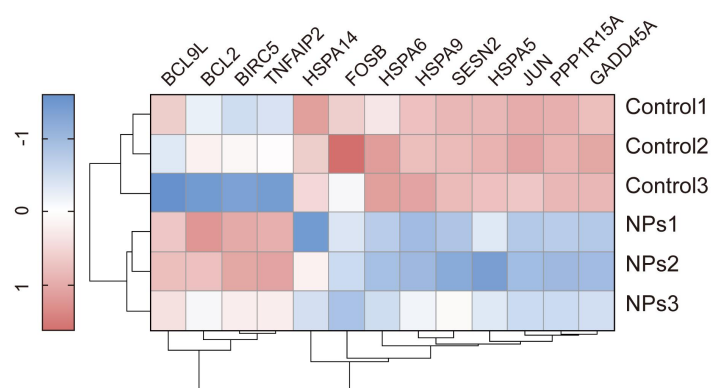

**Supplementary Fig. 11.** Representative normalized heatmap of hierarchical clustering showing the differential content profiles of genes identified in different samples.

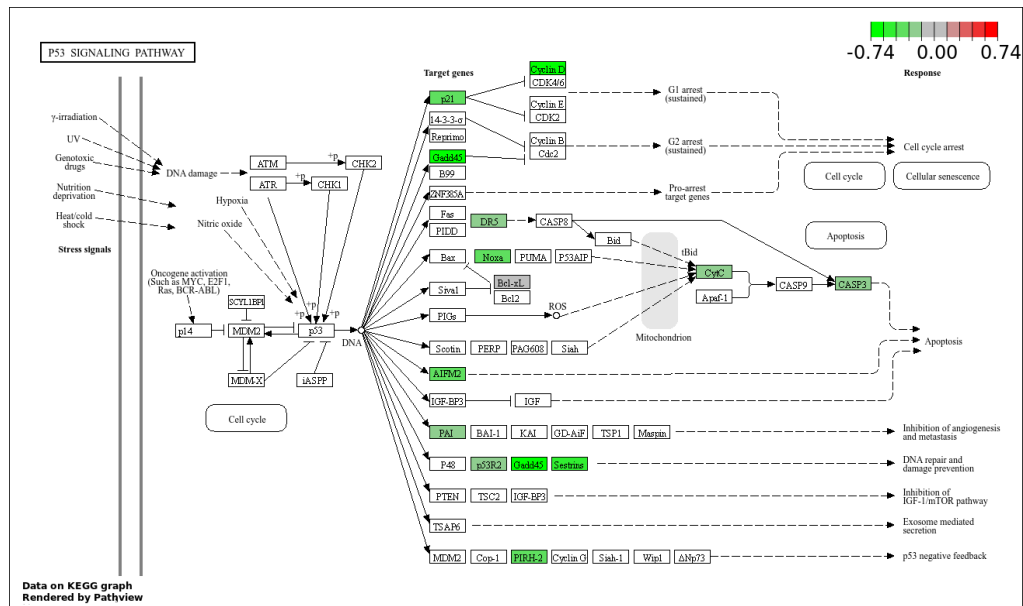

**Supplementary Fig. 12.** The specific change of gene expressions on P53 signaling pathway analyzed by KEGG enrichment. Darker red/green colors indicate higher levels of up-regulation/down-regulation, respectively.

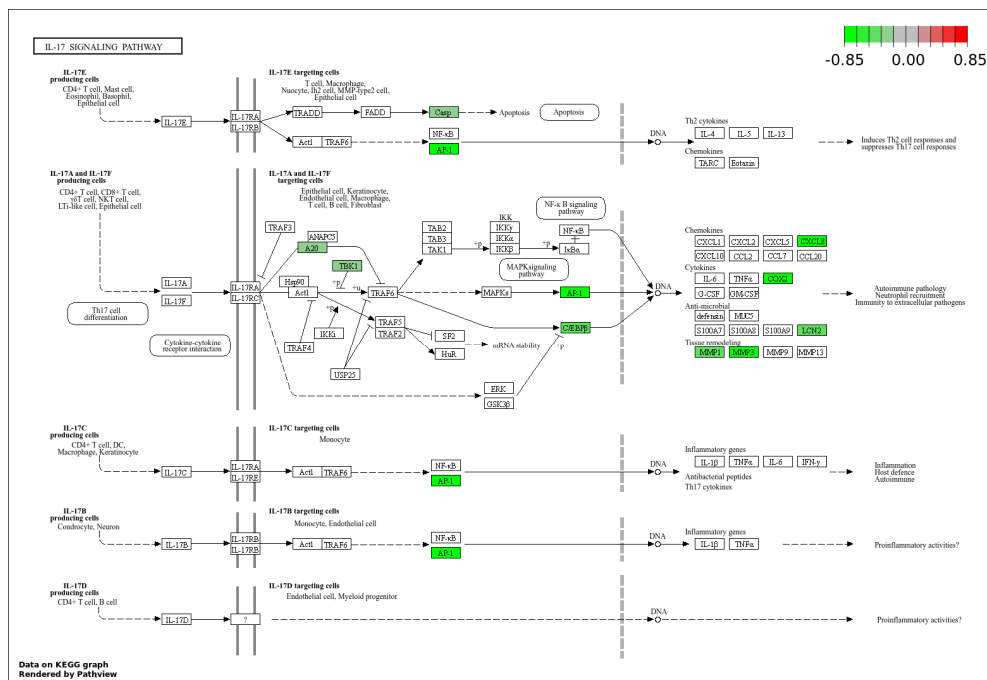

**Supplementary Fig. 13.** The specific change of gene expressions on IL-17 signaling pathway analyzed by KEGG enrichment. Darker red/green colors indicate higher levels of up-regulation/down-regulation, respectively.

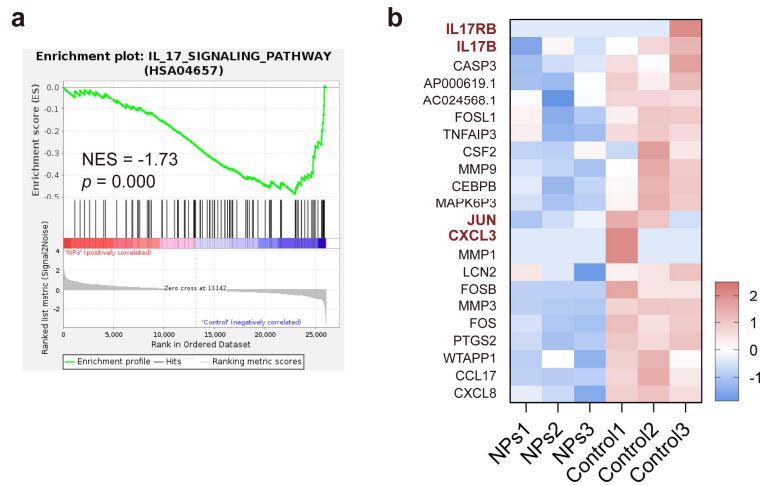

161

162 **Supplementary Fig. 14.** Results of (a) GSEA based on KEGG enrichment of significantly expressed signaling  
 163 pathways, and (b) normalized heatmap showing the differential content profiles of genes identified in IL-17 signaling  
 164 pathway.

165

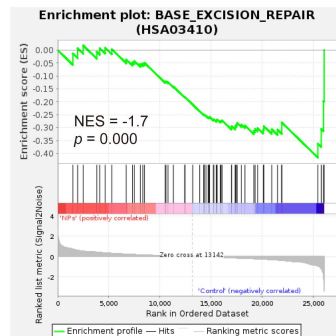

166

167 **Supplementary Fig. 15.** Results of GSEA based on KEGG enrichment of significantly expressed signaling pathways  
 168 (Base excision repair).

169

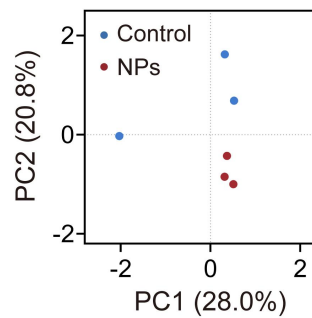

170

171 **Supplementary Fig. 16.** Principal component analysis (PCA) analysis presenting differentially expressed proteins  
 172 expressed by H<sub>2</sub>O<sub>2</sub>-treated HCECs with or without *s*-RHC treatments (termed as “NPs” and” Control”, respectively).  
 173

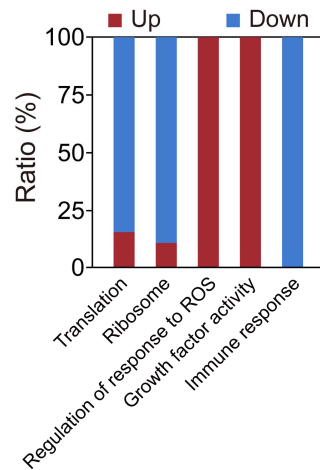

174  
 175 **Supplementary Fig. 17.** Bar graph illustrating the changes of differential proteins analyzed by Gene Ontology (GO).  
 176

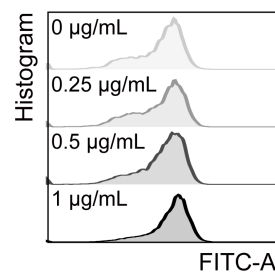

177  
 178 **Supplementary Fig. 18.** Results of intracellular ROS levels in RAW264.7 cells treated with varying LPS  
 179 concentrations by flow cytometry.  
 180

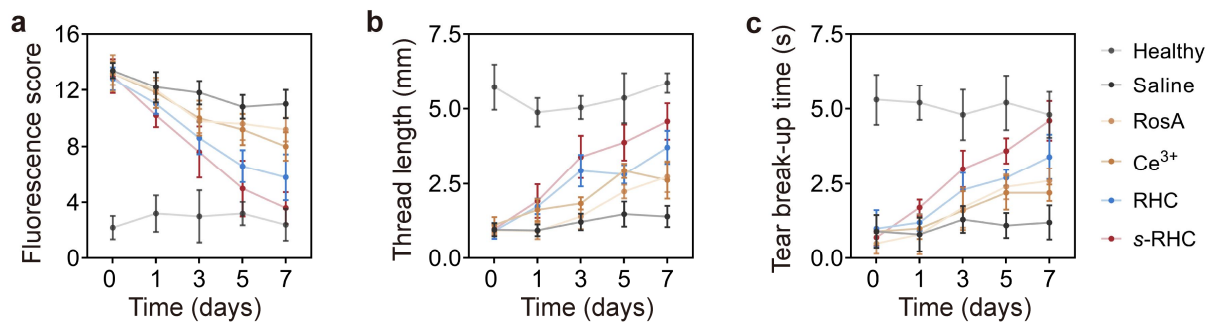

182 **Supplementary Fig. 19.** Records of (a) fluorescein staining score, (b) Schirmer measurement, and (c) TBUT of  
 183 healthy group and evaporative DED model mice treated by saline, RosA,  $\text{Ce}^{3+}$ , RHC, and *s*-RHC group at Day 0, 1, 3,  
 184 5, and 7 (n = 5).

185

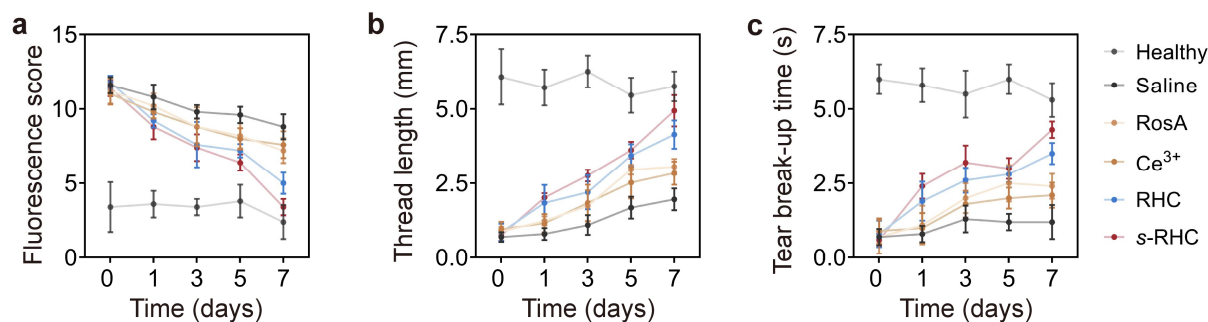

186

187 **Supplementary Fig. 20.** Records of (a) fluorescein staining score, (b) Schirmer measurement, and (c) TBUT of  
 188 healthy group and aqueous deficient DED model mice treated by saline, RosA,  $\text{Ce}^{3+}$ , RHC, and *s*-RHC group at Day 0,  
 189 1, 3, 5, and 7 (n = 5).

190

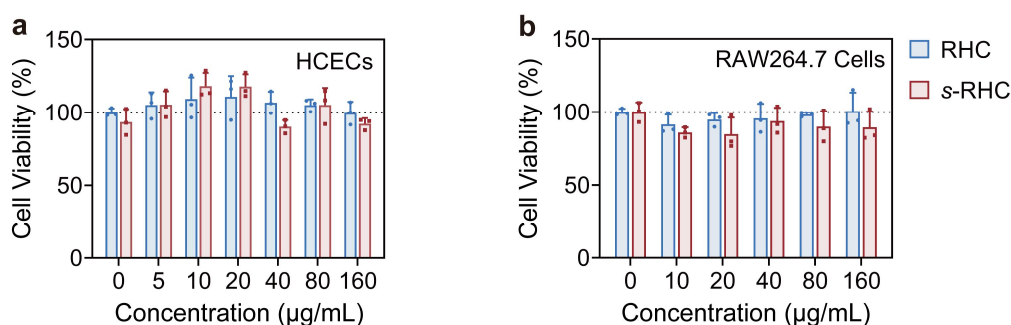

191

192 **Supplementary Fig. 21.** (a) Cell viability of HCECs, and (b) RAW264.7 cells treated with different concentrations of  
 193 RHC and *s*-RHC NPs for 24 h (n = 3).

194

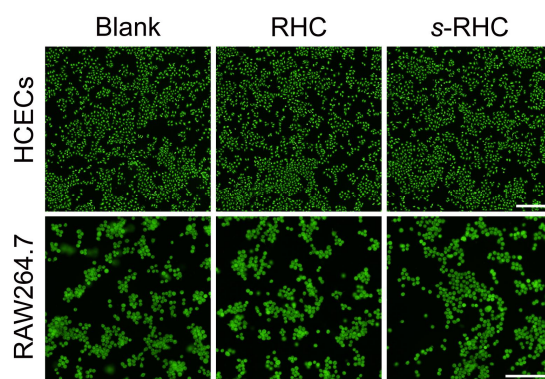

195

196 **Supplementary Fig. 22.** Live/dead cell staining assay of HCECs and RAW264.7 cells treated with different  
 197 formulations for 24 h. Scale bar (upper) = 500  $\mu\text{m}$ , scale bar (lower) = 100  $\mu\text{m}$ .

198

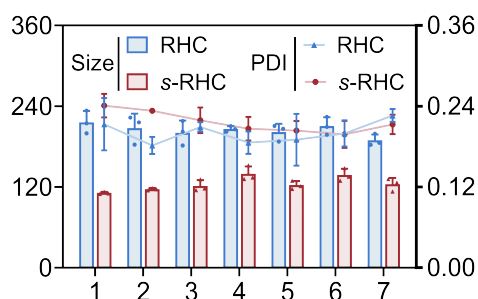

199

200 **Supplementary Fig. 23.** Hydrodynamic size and PDI changes of RHC and *s*-RHC NPs dispersed in water for seven  
 201 days (stored at 4  $^{\circ}\text{C}$ ).

202

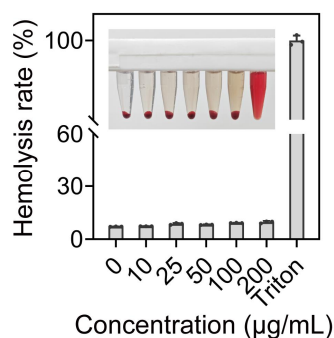

203

204 **Supplementary Fig. 24.** Hemolysis study of *s*-RHC NPs at different concentrations and the digital picture (inset) of  
 205 precipitated blood cells after incubation.

206

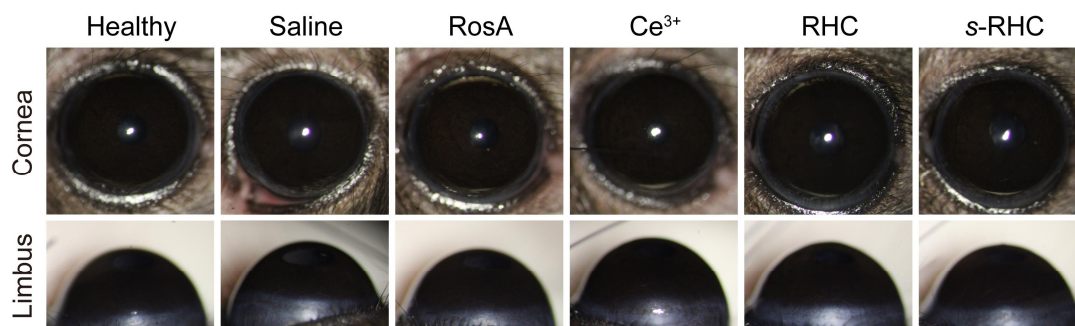

207

208 **Supplementary Fig. 25.** Observation of cornea and limbus of bright light after treating with different formulations at  
209 Day 7.

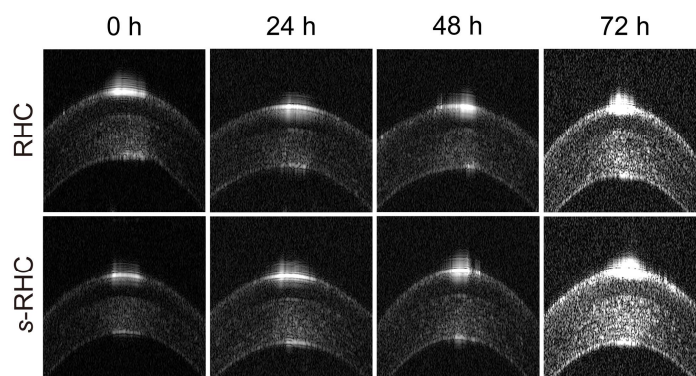

211  
212 **Supplementary Fig. 26.** Representative OCT images of the cornea at 0, 24, 48, and 72 h after the topical instillation of  
213 RHC and *s*-RHC NPs.

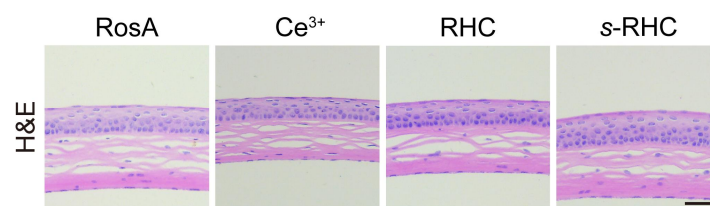

215  
216 **Supplementary Fig. 27.** H&E staining results of cornea after administration of RosA,  $\text{Ce}^{3+}$ , RHC, and *s*-RHC NPs for  
217 72 h. Scale bar = 50  $\mu\text{m}$ .



219 **Supplementary Tables**

220 **Supplementary Table 1.** Description of symbols of genes and proteins shown in this manuscript.

| Symbol     | Description                                                             |
|------------|-------------------------------------------------------------------------|
| PPP1R15A   | Protein Phosphatase 1 Regulatory Subunit 15A                            |
| GADD45A    | Growth Arrest and DNA Damage Inducible Alpha                            |
| JUN        | Jun Proto-Oncogene, AP-1 Transcription Factor Subunit                   |
| MT-CYB     | Mitochondrially Encoded Cytochrome B                                    |
| MT-ATP6    | Mitochondrially Encoded ATP Synthase Membrane Subunit 6                 |
| EGR1       | Early Growth Response 1                                                 |
| HSPA6      | Heat Shock Protein Family A (Hsp70) Member 6                            |
| BCL9L      | B-Cell Lymphoma 9-Like Protein                                          |
| BCL2       | BCL2 Apoptosis Regulator                                                |
| BIRC5      | Baculoviral IAP Repeat Containing 5                                     |
| TNFAIP2    | TNF Alpha Induced Protein 2                                             |
| HSPA14     | Heat Shock Protein Family A (Hsp70) Member 14                           |
| FOSB       | FosB Proto-Oncogene, AP-1 Transcription Factor Subunit                  |
| HSPA9      | Heat Shock Protein Family A (Hsp70) Member 9                            |
| SESN2      | Sestrin 2                                                               |
| HSPA5      | Heat Shock Protein Family A (Hsp70) Member 5                            |
| IL17RB     | Interleukin 17 Receptor B                                               |
| IL17B      | Interleukin 17B                                                         |
| CASP3      | Caspase 3                                                               |
| AP000619.1 | Matrix Metallopeptidase 1 (MMP1) Pseudogene                             |
| AC024568.1 | Heat Shock Protein 90kDa Alpha (cytosolic), Class B Member 1 Pseudogene |
| FOSL1      | FOS Like 1, AP-1 Transcription Factor Subunit                           |
| TNFAIP3    | TNF Alpha Induced Protein 3                                             |
| CSF2       | Colony Stimulating Factor 2                                             |
| MMP9       | Matrix Metallopeptidase 9                                               |
| CEBPB      | CCAAT Enhancer Binding Protein Beta                                     |
| MAPK6P3    | Mitogen-Activated Protein Kinase 6 Pseudogene 3                         |
| CXCL3      | C-X-C Motif Chemokine Ligand 3                                          |
| MMP1       | Matrix Metallopeptidase 1                                               |
| LCN2       | Lipocalin 2                                                             |
| MMP3       | Matrix Metallopeptidase 3                                               |
| FOS        | Fos Proto-Oncogene, AP-1 Transcription Factor Subunit                   |
| PTGS2      | Prostaglandin-Endoperoxide Synthase 2                                   |
| WTAPP1     | WTAP Pseudogene 1                                                       |
| CCL17      | C-C Motif Chemokine Ligand 17                                           |
| CXCL18     | C-X-C Motif Chemokine Ligand 18                                         |

221

222

223     **Supplementary Table 2.** Ocular irritation test rating scale

| Assessment           |                                                                                                                     | Score |
|----------------------|---------------------------------------------------------------------------------------------------------------------|-------|
| Corneal opacity      | No ulceration or opacity                                                                                            | 0     |
|                      | Scattered or diffuse areas of opacity (other than slight dulling of normal luster); details of iris clearly visible | 1     |
|                      | Easily discernible translucent area; details of iris slightly obscured                                              | 2     |
|                      | Opalescent areas; no details of iris visible, size of pupil barely discernible                                      | 3     |
|                      | Opaque cornea; iris not discernible through the opacity                                                             | 4     |
| Iritis               | Normal                                                                                                              | 0     |
|                      | Deepened iris rugae and/or iris congestion or swelling, with                                                        | 1     |
|                      | Hemorrhage, gross destruction of iris, or nonreactivity to light                                                    | 2     |
|                      | Blood vessels normal                                                                                                | 0     |
| Conjunctival redness | Some blood vessels definitely hyperemia (injected)                                                                  | 1     |
|                      | Diffuse crimson color; individual vessels not easily discernible                                                    | 2     |
|                      | Diffuse beefy red                                                                                                   | 3     |
| Total Score:         | Sum of all scores obtained for the cornea, iris, and conjunctivae                                                   |       |

224
